# Supplementary material for: Heart Rate Variability-Guided Training for Enhancing Cardiac-Vagal Modulation, Aerobic Fitness, and Endurance Performance: A Methodological Systematic Review with Meta-Analysis
Source: MDPI journal article supplement (doi:10.3390/ijerph181910299), 2021-09-29
Supplement: s1 [file s1]

## Supplementary materials

### Section 1: Electronic database search

- Participants. Healthy OR active OR sedentary OR trained OR untrained OR recreational OR fit OR young OR runn\* OR swimm\* OR cycli\* OR triathl\* OR athlete\* OR rower\* OR cross-countr\* OR canoeist\* OR kayak\* OR skier\* OR endurance
- Interventions. "Heart rate variability" OR HRV OR "HR variability" OR "training guided" OR "prescription guided" OR "individually guided" OR "individualized recovery"
- Comparison. Traditional OR predefined OR standard\* OR periodization OR predetermined OR "fixed recovery"

## Section 2

**Table S1.** Risk of bias assessment criteria.

|                                                 |                     |                                                                           |
|-------------------------------------------------|---------------------|---------------------------------------------------------------------------|
| <b>Reference: Da Silva et al. [19]</b>          |                     |                                                                           |
| Bias                                            | Authors' judgements | Support for judgement                                                     |
| Random sequence generation (selection bias)     | Unclear risk        | States participants were "randomly assigned". No further details given    |
| Allocation concealment (selection bias)         | Unclear risk        | No mention of allocation concealment                                      |
| Blinding of outcome assessment (detection bias) | High risk           | Quote: "This is a non-blinded, randomised controlled trial"               |
| Incomplete outcome data (attrition bias)        | Low risk            | Less than 20% missing outcome data, losses balanced, and reasons reported |
| Selective reporting (reporting bias)            | Low risk            | All pre-specified outcomes in the method section were reported            |
| <b>Reference: Javaloyes et al. [17]</b>         |                     |                                                                           |
| Bias                                            | Authors' judgements | Support for judgement                                                     |
| Random sequence generation (selection bias)     | High risk           | Non-randomised controlled study                                           |
| Allocation concealment (selection bias)         | High risk           | Non-randomised controlled study                                           |
| Blinding of outcome assessment (detection bias) | High risk           | Quote: "This is a non-blinded, controlled trial"                          |
| Incomplete outcome data (attrition bias)        | High risk           | More than 20% missing outcome data, losses balanced, and reasons reported |
| Selective reporting (reporting bias)            | Low risk            | All pre-specified outcomes in the method section were reported            |
| <b>Reference: Javaloyes et al. [20]</b>         |                     |                                                                           |
| Bias                                            | Authors' judgements | Support for judgement                                                     |
| Random sequence generation (selection bias)     | Unclear risk        | States participants were "randomly assigned". No further details given    |
| Allocation concealment (selection bias)         | Unclear risk        | No mention of allocation concealment                                      |
| Blinding of outcome assessment (detection bias) | Unclear risk        | No mention of outcome assessment blinding                                 |
| Incomplete outcome data (attrition bias)        | Unclear risk        | Initial and final sample sizes were not reported                          |
| Selective reporting (reporting bias)            | Low risk            | All pre-specified outcomes in the method section were reported            |
| <b>Reference: Kiviniemi et al. [21]</b>         |                     |                                                                           |
| Bias                                            | Authors' judgements | Support for judgement                                                     |
| Random sequence generation (selection bias)     | Unclear risk        | States participants were "randomised into". No further details given      |
| Allocation concealment (selection bias)         | Unclear risk        | No mention of allocation concealment                                      |
| Blinding of outcome assessment (detection bias) | Unclear risk        | No mention of outcome assessment blinding                                 |
| Incomplete outcome data (attrition bias)        | Low risk            | Less than 20% missing outcome data, losses balanced, and reasons reported |
| Selective reporting (reporting bias)            | Low risk            | All pre-specified outcomes in the method section were reported            |
| <b>Reference: Kiviniemi et al. [22]</b>         |                     |                                                                           |
| Bias                                            | Authors' judgements | Support for judgement                                                     |
| Random sequence generation (selection bias)     | Unclear risk        | States participants were "randomised into". No further details given      |
| Allocation concealment (selection bias)         | Unclear risk        | No mention of allocation concealment                                      |

|                                                 |                     |                                                                                                |
|-------------------------------------------------|---------------------|------------------------------------------------------------------------------------------------|
| Blinding of outcome assessment (detection bias) | Low risk            | Quote: "Ventilatory threshold was analysed blindly from the..."                                |
| Incomplete outcome data (attrition bias)        | Low risk            | Less than 20% missing outcome data, losses balanced, and reasons reported                      |
| Selective reporting (reporting bias)            | Low risk            | All pre-specified outcomes in the method section were reported                                 |
| <b>Reference: Nuuttila et al. [23]</b>          |                     |                                                                                                |
| Bias                                            | Authors' judgements | Support for judgement                                                                          |
| Random sequence generation (selection bias)     | Unclear risk        | States participants were "randomly assigned". No further details given                         |
| Allocation concealment (selection bias)         | Unclear risk        | No mention of allocation concealment                                                           |
| Blinding of outcome assessment (detection bias) | Unclear risk        | No mention of outcome assessment blinding                                                      |
| Incomplete outcome data (attrition bias)        | High risk           | More than 20% missing outcome data and losses were reported regardless of the allocated groups |
| Selective reporting (reporting bias)            | Low risk            | All pre-specified outcomes in the method section were reported                                 |
| <b>Reference: Schmitt et al. [18]</b>           |                     |                                                                                                |
| Bias                                            | Authors' judgements | Support for judgement                                                                          |
| Random sequence generation (selection bias)     | Unclear risk        | States participants were "randomly matched". No further details given                          |
| Allocation concealment (selection bias)         | Unclear risk        | No mention of allocation concealment                                                           |
| Blinding of outcome assessment (detection bias) | Unclear risk        | No mention of outcome assessment blinding                                                      |
| Incomplete outcome data (attrition bias)        | Unclear risk        | Initial and final sample sizes were not reported                                               |
| Selective reporting (reporting bias)            | Low risk            | All pre-specified outcomes in the method section were reported                                 |
| <b>Reference: Vesterinen et al. [24]</b>        |                     |                                                                                                |
| Bias                                            | Authors' judgements | Support for judgement                                                                          |
| Random sequence generation (selection bias)     | Unclear risk        | States participants were "randomised into". No further details given                           |
| Allocation concealment (selection bias)         | Unclear risk        | No mention of allocation concealment                                                           |
| Blinding of outcome assessment (detection bias) | Unclear risk        | No mention of outcome assessment blinding                                                      |
| Incomplete outcome data (attrition bias)        | High risk           | More than 20% missing outcome data and losses were reported regardless of the allocated groups |
| Selective reporting (reporting bias)            | Low risk            | All pre-specified outcomes in the method section were reported                                 |

**Table S2.** Risk of bias across studies.

| Risk of bias item                               | Low risk<br>n/N (%) | Unclear risk<br>n/N (%) | High risk<br>n/N (%) |
|-------------------------------------------------|---------------------|-------------------------|----------------------|
| Random sequence generation (selection bias)     | 0/8 (0)             | 7/8 (87.5)              | 1/8 (12.5)           |
| Allocation concealment (selection bias)         | 0/8 (0)             | 7/8 (87.5)              | 1/8 (12.5)           |
| Blinding of outcome assessment (detection bias) | 1/8 (12.5)          | 5/8 (62.5)              | 2/8 (25)             |
| Incomplete outcome data (attrition bias)        | 3/8 (37.5)          | 2/8 (25)                | 3/8 (37.5)           |
| Selective reporting (reporting bias)            | 0/8 (0)             | 0/8 (0)                 | 8/8 (100)            |

### Section 3: Publication bias assessment

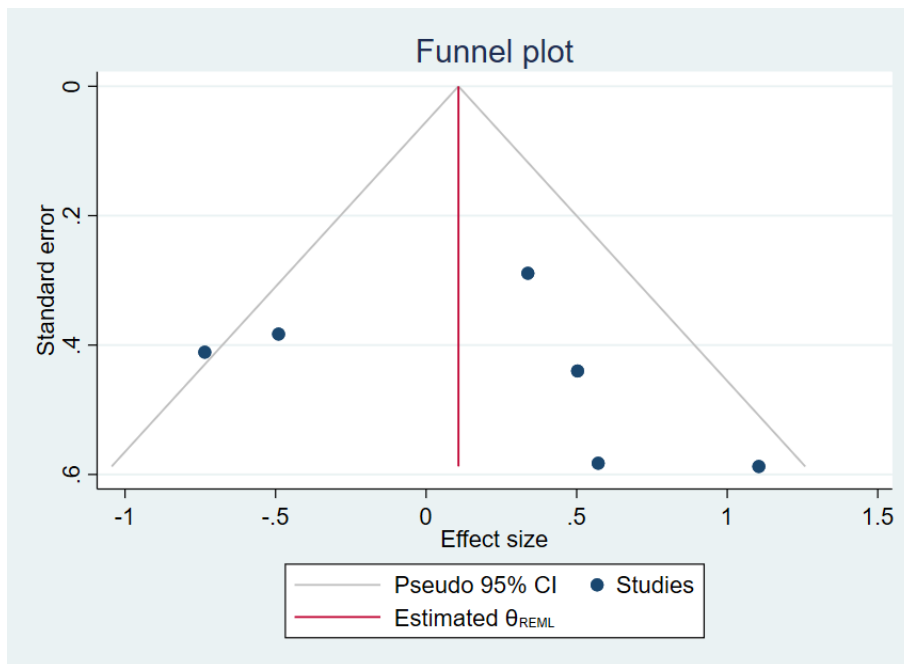

Figure S1. Funnel plot with trim-and-fill method for standing vagal-related heart rate variability indices

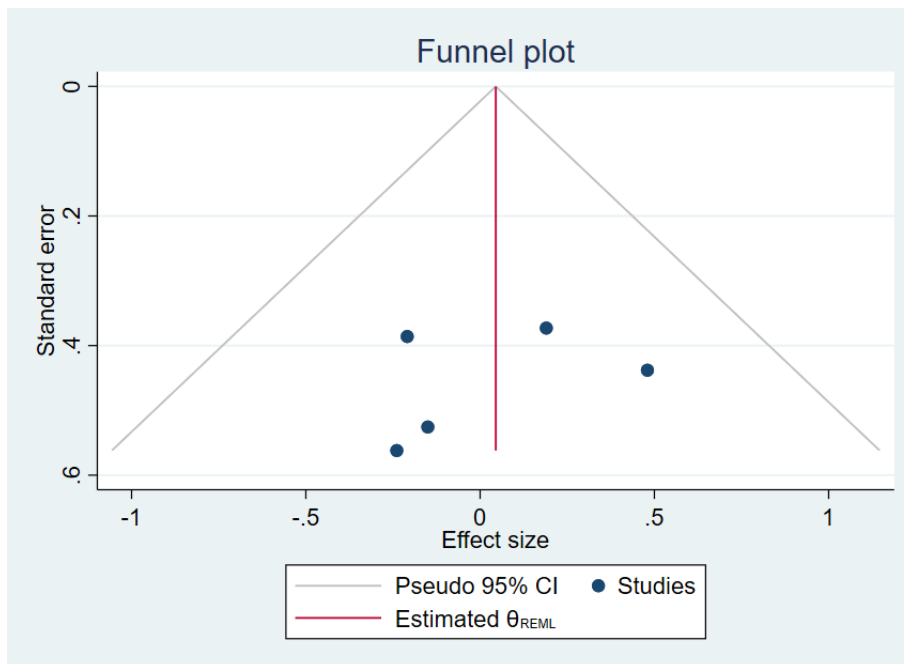

Figure S2. Funnel plot with trim-and-fill method for standing heart rate

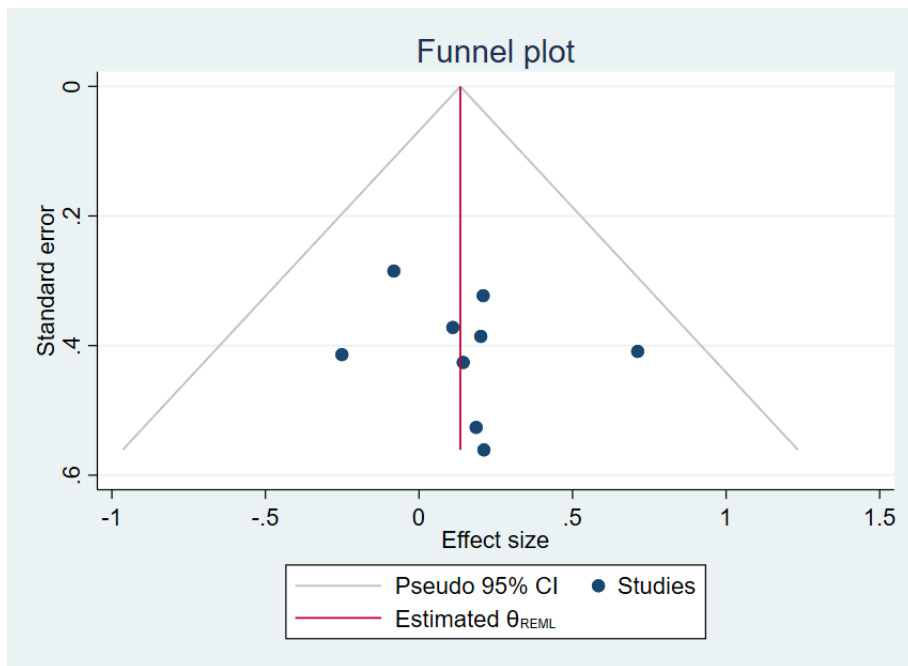

Figure S3. Funnel plot with trim-and-fill method for VO<sub>2</sub> max

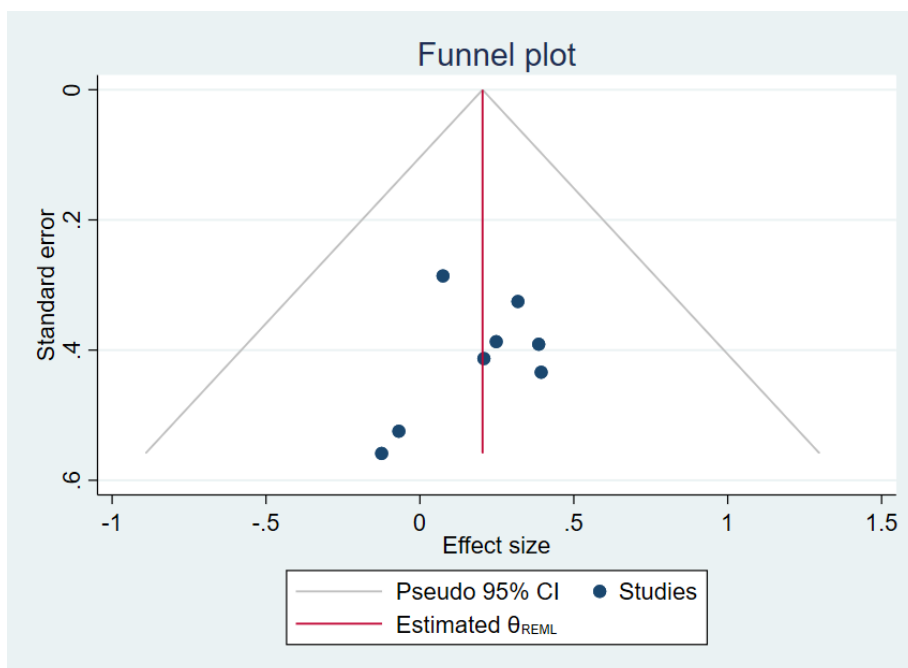

Figure S4. Funnel plot with trim-and-fill method for maximal aerobic capacity

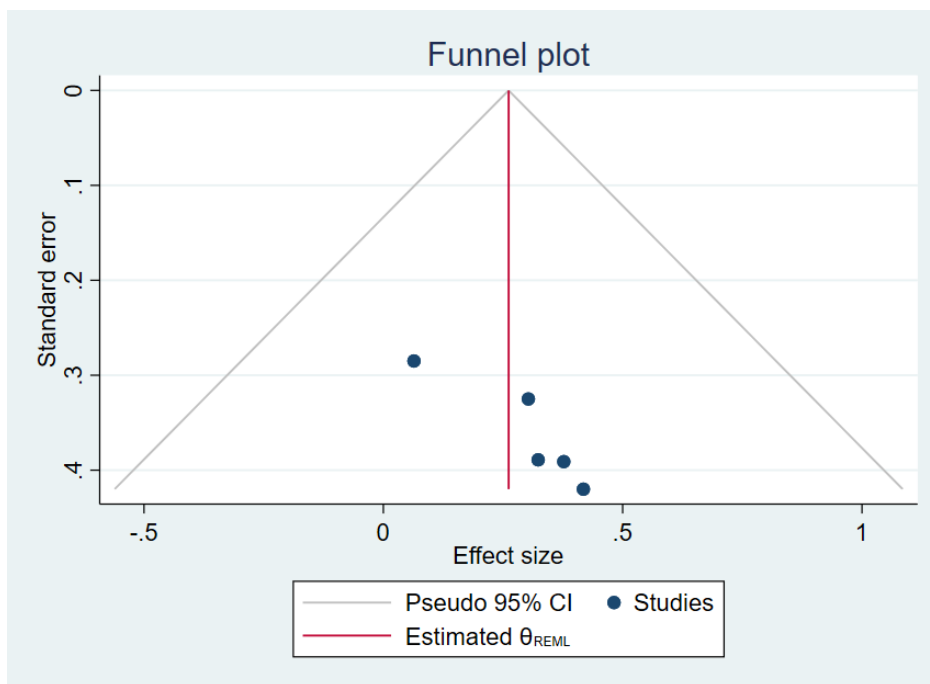

Figure S5. Funnel plot with trim-and-fill method for aerobic capacity at second ventilatory threshold

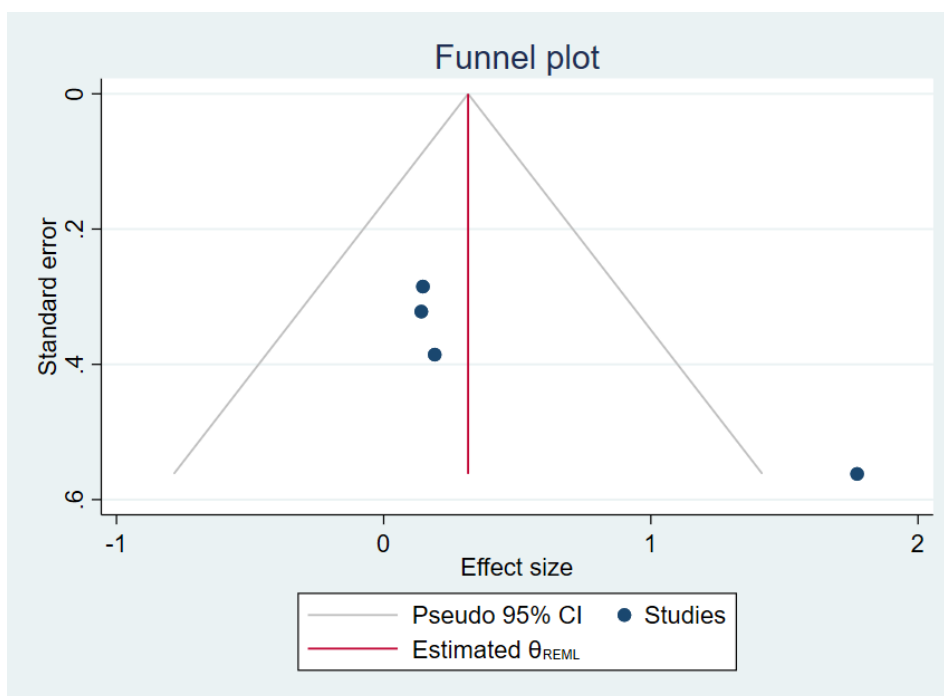

Figure S6. Funnel plot with trim-and-fill method for aerobic capacity at first ventilatory threshold

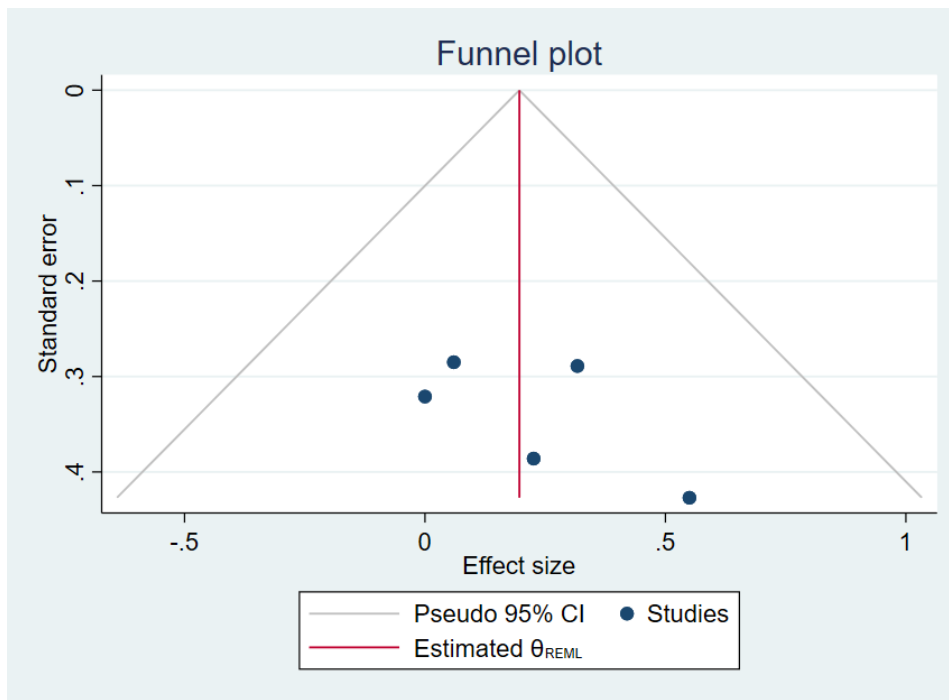

Figure S7. Funnel plot with trim-and-fill method for endurance performance
